# Supplementary material
Source: publisher figshare collection journal article supplement (https://diabetesjournals.figshare.com/ndownloader/files/25878378)
Supplement: Supplementary file 1 [file 25878378]

## **Supplementary Tables**

Supplementary Table 1 Characteristics of the excluded and included participants

Supplementary Table 2 Multivariable-adjusted HRs (95% CI) of mortality according to the baseline status of prediabetes after excluding the participants who died due to liver cancer and pancreatic cancer

Supplementary Table 3 Multivariable-adjusted HRs (95% CI) of mortality according to the prediabetes and diabetes after excluding the people who had prediabetes at baseline and developed diabetes later (in ADA, n=655), (in WHO/IEC, n=422)

Supplementary Table 4 Multivariable-adjusted HRs (95% CI) of mortality according to the baseline status of prediabetes and diabetes after excluding those (n=6,686) who were taking antihypertensive medication.

Supplementary Table 5 Multivariable-adjusted HRs (95% CI) of mortality according to the baseline status of prediabetes and diabetes after excluding those (n=4,167) who were using lipid-lowering medication.

Supplementary Table 6 Multivariable-adjusted HRs (95% CI) of mortality for prediabetes subgroups, using different glycemc criteria

Supplementary Table 7 Multivariable-adjusted HRs (95% CI) of mortality according to the baseline status of prediabetes and diabetes in one major company (n=36,379) while additionally adjusting for job position, occupational physical activity, and alcohol intake

## **Supplementary Figures**

Supplementary Figure 1–Multivariable-adjusted HRs (95% CI) of all-cause and cause-specific mortality according to the baseline status of prediabetes and diabetes

Supplementary Figure 2–Multivariable-adjusted HRs (95% CI) of all-cause and cause-specific mortality for prediabetes subgroups, using the ADA or the WHO/IEC criteria

**Supplementary Table 1** Characteristics of the excluded and included participants

|                          | Included participants (n=62,875) | Excluded participants (n=46,821) |
|--------------------------|----------------------------------|----------------------------------|
| Age (year)               | 45.0 ± 10.1                      | 39.8 ± 13.4                      |
| Men (%)                  | 85.4                             | 78.9                             |
| BMI (kg/m <sup>2</sup> ) | 23.4 ± 3.5                       | 23.1 ± 3.6*                      |
| Current smoker (%)       | 33.1                             | 29.7*                            |
| SBP (mmHg)               | 121.1 ± 15.1                     | 120.9 ± 15.9*                    |
| DBP (mmHg)               | 76.2 ± 10.8                      | 73.0 ± 11.9*                     |
| Hypertension (yes, %)    | 20.3                             | 18.6                             |
| Triglycerides (mg/dL)    | 121.0 ± 93.0                     | 117.6 ± 98.3*                    |
| HDL-C (mg/dL)            | 58.7 ± 15.2                      | 59.7 ± 15.0*                     |
| LDL-C (mg/dL)            | 120.9 ± 30.4                     | 116.1 ± 31.4*                    |
| Dyslipidemia (yes, %)    | 45.2                             | 31.2                             |
| HbA1c                    | 5.59 ± 0.66                      | 5.58 ± 0.76*                     |
| Blood glucose            | 99.7 ± 18.5                      | 98.8 ± 24.8*                     |

Unless indicated otherwise data are given as the age- and sex- adjusted (mean ± SE) or percentage distribution. BMI, body mass index; SBP, systolic blood pressure; DBP, diastolic blood pressure, HDL-C, high-density lipoprotein cholesterol; LDL-C, low-density lipoprotein cholesterol.

\*Number of excluded participants (n=46,631 for BMI; n=41,760 for smoking behaviors; n=46,573 for SBP and DBP; n=35,516 for triglycerides; n=35,499 for HDL-C; n=35,488 for LDL-C; n=26,878 for HbA1c; n=35,202 for blood glucose.

**Supplementary Table 2** Multivariable-adjusted HRs (95% CI) of mortality according to the baseline status of prediabetes after excluding the participants who died due to liver cancer and pancreatic cancer

|                         | ADA criteria     |                         | WHO/IEC criteria |                         |
|-------------------------|------------------|-------------------------|------------------|-------------------------|
|                         | Normoglycemia    | Prediabetes             | Normoglycemia    | Prediabetes             |
| No. of participants     | 33,984           | 24,131                  | 50,101           | 8,014                   |
| Person-years            | 191,119          | 132,478                 | 280,769          | 42,828                  |
| <b>Cancer mortality</b> |                  |                         |                  |                         |
| No. of deaths           | 20               | 45                      | 44               | 21                      |
| Model 1                 | 1.00 (reference) | <b>2.61 (1.50–4.54)</b> | 1.00 (reference) | <b>2.28 (1.33–3.91)</b> |
| Model 2                 | 1.00 (reference) | <b>2.53 (1.44–4.44)</b> | 1.00 (reference) | <b>2.17 (1.25–2.69)</b> |

ADA, American Diabetes Association; WHO, World Health Organization; IEC, International Expert Committee; HRs, hazard ratios; CI, confidence interval; CVD, cardiovascular disease. Values in bold show statistical significance. Model 1 adjusted for age (year, continuous), sex, and worksite; model 2 additionally adjusted for BMI (kg/m<sup>2</sup>, continuous), smoking status (never smoker, former smoker, or current smoker), hypertension (yes or no), and dyslipidemia (yes or no).

**Supplementary Table 3** Multivariable-adjusted HRs (95% CI) of mortality according to the prediabetes and diabetes after excluding the people who had prediabetes at baseline and developed diabetes later (in ADA, n=655), (in WHO/IEC, n=422)

|                              | ADA criteria     |                         | WHO/IEC criteria |                         |
|------------------------------|------------------|-------------------------|------------------|-------------------------|
|                              | Normoglycemia    | Prediabetes             | Normoglycemia    | Prediabetes             |
| No. of participants          | 33,990           | 23,488                  | 50,114           | 7,597                   |
| Person-years                 | 191,140          | 129,974                 | 280,813          | 41,071                  |
| <b>All-cause mortality</b>   |                  |                         |                  |                         |
| No. of deaths                | 78               | 89                      | 141              | 35                      |
| Model 1                      | 1.00 (reference) | 1.35 (0.98–1.85)        | 1.00 (reference) | 1.31 (0.90–1.92)        |
| Model 2                      | 1.00 (reference) | 1.31 (0.95–1.81)        | 1.00 (reference) | 1.23 (0.84–1.82)        |
| <b>Cancer mortality</b>      |                  |                         |                  |                         |
| No. of deaths                | 26               | 50                      | 57               | 22                      |
| Model 1                      | 1.00 (reference) | <b>2.09 (1.28–3.45)</b> | 1.00 (reference) | <b>1.84 (1.11–3.07)</b> |
| Model 2                      | 1.00 (reference) | <b>2.08 (1.26–3.45)</b> | 1.00 (reference) | <b>1.81 (1.08–3.04)</b> |
| <b>CVD mortality</b>         |                  |                         |                  |                         |
| No. of deaths                | 19               | 20                      | 32               | 8                       |
| Model 1                      | 1.00 (reference) | 1.18 (0.61–2.28)        | 1.00 (reference) | 1.25 (0.57–2.78)        |
| Model 2                      | 1.00 (reference) | 0.98 (0.50–1.90)        | 1.00 (reference) | 0.99 (0.44–2.20)        |
| <b>Other cause mortality</b> |                  |                         |                  |                         |
| No. of deaths                | 33               | 19                      | 52               | 5                       |
| Model 1                      | 1.00 (reference) | 0.79 (0.44–1.43)        | 1.00 (reference) | 0.61 (0.24–1.54)        |
| Model 2                      | 1.00 (reference) | 0.86 (0.47–1.57)        | 1.00 (reference) | 0.63 (0.25–1.62)        |

ADA, American Diabetes Association; WHO, World Health Organization; IEC, International Expert Committee; HRs, hazard ratios; CI, confidence interval; CVD, cardiovascular disease. Values in bold show statistical significance. Model 1 adjusted for age (year, continuous), sex, and worksite; model 2 additionally adjusted for BMI (kg/m<sup>2</sup>, continuous), smoking status (never smoker, former smoker, or current smoker), hypertension (yes or no), and dyslipidemia (yes or no).

**Supplementary Table 4** Multivariable-adjusted HRs (95% CI) of mortality according to the baseline status of prediabetes and diabetes after excluding those (n=6,686) who were taking antihypertensive medication.

|                              | ADA criteria     |                         |                         | WHO/IEC criteria |                         |                         |
|------------------------------|------------------|-------------------------|-------------------------|------------------|-------------------------|-------------------------|
|                              | Normoglycemia    | Prediabetes             | Diabetes                | Normoglycemia    | Prediabetes             | Diabetes                |
| No. of Participants          | 32,026           | 20,813                  | 3,071                   | 46,479           | 6,518                   | 3,102                   |
| Person-years                 | 181,687          | 116,568                 | 15,792                  | 262,699          | 35,556                  | 15,792                  |
| <b>All-cause mortality</b>   |                  |                         |                         |                  |                         |                         |
| No. of deaths                | 70               | 88                      | 31                      | 123              | 35                      | 31                      |
| Model 1                      | 1.00 (reference) | <b>1.57 (1.13–2.19)</b> | <b>3.28 (2.09–5.13)</b> | 1.00 (reference) | <b>1.60 (1.09–2.36)</b> | <b>2.81 (1.86–4.23)</b> |
| Model 2                      | 1.00 (reference) | <b>1.53 (1.09–2.13)</b> | <b>3.01 (1.89–4.78)</b> | 1.00 (reference) | <b>1.52 (1.03–2.25)</b> | <b>2.57 (1.69–3.93)</b> |
| <b>Cancer mortality</b>      |                  |                         |                         |                  |                         |                         |
| No. of deaths                | 23               | 45                      | 10                      | 47               | 21                      | 10                      |
| Model 1                      | 1.00 (reference) | <b>2.22 (1.31–3.75)</b> | <b>2.78 (1.28–6.05)</b> | 1.00 (reference) | <b>2.24 (1.31–3.81)</b> | <b>2.09 (1.04–4.23)</b> |
| Model 2                      | 1.00 (reference) | <b>2.22 (1.30–3.78)</b> | <b>2.79 (1.25–6.18)</b> | 1.00 (reference) | <b>2.22 (1.29–3.82)</b> | <b>2.09 (1.02–4.29)</b> |
| <b>CVD mortality</b>         |                  |                         |                         |                  |                         |                         |
| No. of deaths                | 16               | 18                      | 9                       | 28               | 6                       | 9                       |
| Model 1                      | 1.00 (reference) | 1.28 (0.63–2.59)        | <b>3.69 (1.54–8.84)</b> | 1.00 (reference) | 1.09 (0.44–2.68)        | <b>3.26 (1.48–7.16)</b> |
| Model 2                      | 1.00 (reference) | 1.09 (0.54–2.23)        | <b>2.52 (1.02–6.21)</b> | 1.00 (reference) | 0.88 (0.35–2.18)        | <b>2.30 (1.02–5.18)</b> |
| <b>Other cause mortality</b> |                  |                         |                         |                  |                         |                         |
| No. of deaths                | 31               | 25                      | 12                      | 48               | 8                       | 12                      |
| Model 1                      | 1.00 (reference) | 1.21 (0.69–2.10)        | <b>3.70 (1.81–7.55)</b> | 1.00 (reference) | 1.16 (0.54–2.49)        | <b>3.45 (1.77–6.71)</b> |
| Model 2                      | 1.00 (reference) | 1.23 (0.70–2.16)        | <b>3.68 (1.74–7.76)</b> | 1.00 (reference) | 1.15 (0.53–2.52)        | <b>3.38 (1.69–6.75)</b> |

ADA, American Diabetes Association; WHO, World Health Organization; IEC, International Expert Committee; HRs, hazard ratios; CI, confidence interval; CVD, cardiovascular disease. Values in bold show statistical significance. Model 1 adjusted for age (year, continuous), sex, and worksite; model 2 additionally adjusted for BMI (kg/m<sup>2</sup>, continuous), smoking status (never smoker, former smoker, or current smoker), hypertension (yes or no), and dyslipidemia (yes or no).

**Supplementary Table 5** Multivariable-adjusted HRs (95% CI) of mortality according to the baseline status of prediabetes and diabetes after excluding those (n=4,167) who were using lipid-lowering medication.

|                              | ADA criteria     |                         |                         | WHO/IEC criteria |                         |                         |
|------------------------------|------------------|-------------------------|-------------------------|------------------|-------------------------|-------------------------|
|                              | Normoglycemia    | Prediabetes             | Diabetes                | Normoglycemia    | Prediabetes             | Diabetes                |
| No. of participants          | 32,879           | 22,205                  | 3,534                   | 47,980           | 7,104                   | 3,534                   |
| Person-years                 | 185,066          | 122,059                 | 17,498                  | 269,117          | 38,008                  | 17,498                  |
| <b>All-cause mortality</b>   |                  |                         |                         |                  |                         |                         |
| No. of deaths                | 74               | 104                     | 37                      | 135              | 43                      | 37                      |
| Model 1                      | 1.00 (reference) | <b>1.71 (1.25–2.34)</b> | <b>3.40 (2.24–5.18)</b> | 1.00 (reference) | <b>1.72 (1.20–2.44)</b> | <b>2.81 (1.92–4.12)</b> |
| Model 2                      | 1.00 (reference) | <b>1.60 (1.16–2.20)</b> | <b>2.82 (1.82–4.37)</b> | 1.00 (reference) | <b>1.54 (1.08–2.22)</b> | <b>2.36 (1.59–3.51)</b> |
| <b>Cancer mortality</b>      |                  |                         |                         |                  |                         |                         |
| No. of deaths                | 26               | 56                      | 12                      | 57               | 25                      | 12                      |
| Model 1                      | 1.00 (reference) | <b>2.46 (1.51–4.00)</b> | <b>2.84 (1.39–5.82)</b> | 1.00 (reference) | <b>2.14 (1.32–3.49)</b> | <b>1.95 (1.03–3.71)</b> |
| Model 2                      | 1.00 (reference) | <b>2.34 (1.43–3.83)</b> | <b>2.57 (1.23–5.39)</b> | 1.00 (reference) | <b>2.00 (1.28–3.28)</b> | 1.78 (0.92–3.44)        |
| <b>CVD mortality</b>         |                  |                         |                         |                  |                         |                         |
| No. of deaths                | 18               | 21                      | 13                      | 31               | 8                       | 13                      |
| Model 1                      | 1.00 (reference) | 1.33 (0.69–2.57)        | <b>4.45 (2.06–9.62)</b> | 1.00 (reference) | 1.30 (0.59–2.89)        | <b>4.01 (2.02–7.97)</b> |
| Model 2                      | 1.00 (reference) | 1.07 (0.55–2.09)        | <b>2.64 (1.18–5.92)</b> | 1.00 (reference) | 0.99 (0.44–2.21)        | <b>2.52 (1.23–5.15)</b> |
| <b>Other cause mortality</b> |                  |                         |                         |                  |                         |                         |
| No. of deaths                | 30               | 27                      | 12                      | 47               | 10                      | 12                      |
| Model 1                      | 1.00 (reference) | 1.27 (0.73–2.19)        | <b>3.42 (1.67–7.02)</b> | 1.00 (reference) | 1.38 (0.68–2.79)        | <b>3.22 (1.65–6.29)</b> |
| Model 2                      | 1.00 (reference) | 1.28 (0.73–2.23)        | <b>3.25 (1.53–6.92)</b> | 1.00 (reference) | 1.37 (0.67–2.80)        | <b>3.03 (1.51–6.11)</b> |

ADA, American Diabetes Association; WHO, World Health Organization; IEC, International Expert Committee; HRs, hazard ratios; CI, confidence interval; CVD, cardiovascular disease. Values in bold show statistical significance. Model 1 adjusted for age (year, continuous), sex, and worksite; model 2 additionally adjusted for BMI (kg/m<sup>2</sup>, continuous), smoking status (never smoker, former smoker, or current smoker), hypertension (yes or no), and dyslipidemia (yes or no).

**Supplementary Table 6** Multivariable-adjusted HRs (95% CI) of mortality for prediabetes subgroups, using different glycemic criteria

| Definition                              | No. of participants | Person-years | All-cause mortality     | Cancer mortality        | CVD mortality           | Other cause mortality   |
|-----------------------------------------|---------------------|--------------|-------------------------|-------------------------|-------------------------|-------------------------|
| <b>Overall</b>                          |                     |              |                         |                         |                         |                         |
| No. of deaths                           |                     |              | 78                      | 26                      | 19                      | 33                      |
| FPG <100 mg/dl and HbA1c <5.7%          | 33,990              | 191,140      | 1.00 (reference)        | 1.00 (reference)        | 1.00 (reference)        | 1.00 (reference)        |
| No. of deaths                           |                     |              | 63                      | 31                      | 13                      | 19                      |
| FPG 100-109 mg/dl and/or HbA1c 5.7-5.9% | 16,124              | 89,673       | <b>1.43 (1.01–2.02)</b> | <b>2.07 (1.21–3.56)</b> | 1.03 (0.50–2.14)        | 1.18 (0.66–2.12)        |
| No. of deaths                           |                     |              | 44                      | 26                      | 8                       | 10                      |
| FPG 110-125 mg/dl and/or HbA1c 6.0-6.4% | 8,019               | 42,854       | <b>1.74 (1.17–2.59)</b> | <b>2.99 (1.66–5.38)</b> | 0.95 (0.40–2.27)        | 1.24 (0.58–2.65)        |
| No. of deaths                           |                     |              | 44                      | 14                      | 17                      | 13                      |
| Diabetes                                | 4,652               | 23,210       | <b>2.69 (1.78–4.09)</b> | <b>2.62 (1.29–5.33)</b> | <b>2.72 (1.28–5.79)</b> | <b>2.63 (1.27–5.47)</b> |
| <b>By FPG</b>                           |                     |              |                         |                         |                         |                         |
| No. of deaths                           |                     |              | 95                      | 33                      | 22                      | 40                      |
| FPG <100 mg/dl                          | 38,338              | 214,604      | 1.00 (reference)        | 1.00 (reference)        | 1.00 (reference)        | 1.00 (reference)        |
| No. of deaths                           |                     |              | 59                      | 31                      | 12                      | 16                      |
| FPG 100-109 mg/dl                       | 14,679              | 81,400       | 1.36 (0.97–1.90)        | <b>2.04 (1.22–3.39)</b> | 1.07 (0.52–2.20)        | 0.97 (0.53–1.77)        |
| No. of deaths                           |                     |              | 37                      | 21                      | 8                       | 8                       |
| FPG 110-125 mg/dl                       | 5,706               | 30,634       | <b>1.90 (1.28–2.86)</b> | <b>3.09 (1.71–5.56)</b> | 1.43 (0.61–3.37)        | 1.21 (0.55–2.70)        |
| No. of deaths                           |                     |              | 38                      | 12                      | 15                      | 11                      |
| FPG ≥126 mg/dl                          | 4,062               | 20,238       | <b>2.49 (1.28–2.86)</b> | <b>2.31 (1.13–4.72)</b> | <b>2.95 (1.41–6.20)</b> | <b>2.26 (1.08–4.74)</b> |
| <b>By HbA1c</b>                         |                     |              |                         |                         |                         |                         |
| No. of deaths                           |                     |              | 127                     | 51                      | 30                      | 46                      |
| HbA1c <5.7%                             | 47,224              | 26,5413      | 1.00 (reference)        | 1.00 (reference)        | 1.00 (reference)        | 1.00 (reference)        |
| No. of deaths                           |                     |              | 40                      | 18                      | 10                      | 12                      |
| HbA1c 5.7-5.9%                          | 6,921               | 37,481       | <b>1.73 (1.20–2.50)</b> | <b>1.86 (1.07–3.23)</b> | 1.46 (0.70–3.05)        | 1.80 (0.93–3.48)        |
| No. of deaths                           |                     |              | 24                      | 15                      | 3                       | 6                       |

|                |       |        |                         |                         |                         |                         |
|----------------|-------|--------|-------------------------|-------------------------|-------------------------|-------------------------|
| HbA1c 6.0-6.4% | 4,736 | 24,648 | 1.36 (0.86–2.14)        | <b>2.04 (1.11–3.75)</b> | 0.50 (0.15–1.70)        | 1.30 (0.93–3.48)        |
| No. of deaths  |       |        | 38                      | 13                      | 14                      | 11                      |
| HbA1c ≥6.5%    | 3,904 | 19,334 | <b>2.37 (1.59–3.53)</b> | <b>2.03 (1.06–3.92)</b> | <b>2.36 (1.16–4.80)</b> | <b>2.70 (1.30–5.59)</b> |

---

ADA, American Diabetes Association; WHO, World Health Organization; IEC, International Expert Committee; HRs, hazard ratios; CI, confidence interval; CVD, cardiovascular disease. Values in bold show statistical significance. Model was adjusted for age (year, continuous), sex, worksite, BMI (kg/m<sup>2</sup>), smoking status (never smoker, former smoker, or current smoker), hypertension (yes or no), and dyslipidemia (yes or no).



**Supplementary Table 7** Multivariable-adjusted HRs (95% CI) of mortality according to the baseline status of prediabetes and diabetes in one major company (n=36,379) while additionally adjusting for job position, occupational physical activity, and alcohol intake

|                              | ADA criteria     |                         |                         | WHO/IEC criteria |                         |                         |
|------------------------------|------------------|-------------------------|-------------------------|------------------|-------------------------|-------------------------|
|                              | Normoglycemia    | Prediabetes             | Diabetes                | Normoglycemia    | Prediabetes             | Diabetes                |
| No. of participants          | 17,408           | 16,132                  | 2,839                   | 28,142           | 5,398                   | 2,839                   |
| Person-years                 | 105,661          | 95,209                  | 15,430                  | 169,730          | 31,140                  | 15,430                  |
| <b>All-cause mortality</b>   |                  |                         |                         |                  |                         |                         |
| No. of deaths                | 35               | 69                      | 22                      | 71               | 33                      | 22                      |
| Model 1                      | 1.00 (reference) | <b>1.71 (1.12–2.60)</b> | <b>2.85 (1.62–4.99)</b> | 1.00 (reference) | <b>1.98 (1.29–3.02)</b> | <b>2.44 (1.49–4.01)</b> |
| Model 2                      | 1.00 (reference) | <b>1.55 (1.01–2.38)</b> | <b>2.32 (1.28–4.18)</b> | 1.00 (reference) | <b>1.78 (1.15–2.74)</b> | <b>2.07 (1.23–3.50)</b> |
| <b>Cancer mortality</b>      |                  |                         |                         |                  |                         |                         |
| No. of deaths                | 10               | 41                      | 5                       | 31               | 20                      | 5                       |
| Model 1                      | 1.00 (reference) | <b>3.34 (1.65–6.79)</b> | 2.03 (0.67–6.12)        | 1.00 (reference) | <b>2.50 (1.40–4.46)</b> | 1.13 (0.43–2.96)        |
| Model 2                      | 1.00 (reference) | <b>3.32 (1.62–6.82)</b> | 2.04 (0.65–6.34)        | 1.00 (reference) | <b>2.46 (1.35–4.46)</b> | 1.13 (0.42–3.03)        |
| <b>CVD mortality</b>         |                  |                         |                         |                  |                         |                         |
| No. of deaths                | 10               | 15                      | 8                       | 19               | 6                       | 8                       |
| Model 1                      | 1.00 (reference) | 1.29 (0.57–2.96)        | <b>3.61 (1.34–9.71)</b> | 1.00 (reference) | 1.33 (0.52–3.40)        | <b>3.30 (1.38–7.85)</b> |
| Model 2                      | 1.00 (reference) | 1.03 (0.44–2.37)        | 2.10 (0.74–5.95)        | 1.00 (reference) | 1.02 (0.39–2.64)        | 2.07 (0.83–5.17)        |
| <b>Other cause mortality</b> |                  |                         |                         |                  |                         |                         |
| No. of deaths                | 15               | 13                      | 9                       | 21               | 7                       | 9                       |
| Model 1                      | 1.00 (reference) | 0.83 (0.39–1.79)        | <b>3.28 (1.35–7.96)</b> | 1.00 (reference) | 1.67 (0.69–4.01)        | <b>4.15 (1.82–9.48)</b> |
| Model 2                      | 1.00 (reference) | 0.75 (0.35–1.64)        | <b>2.68 (1.03–6.98)</b> | 1.00 (reference) | 1.53 (0.63–3.77)        | <b>3.67 (1.51–8.92)</b> |

ADA, American Diabetes Association; WHO, World Health Organization; IEC, International Expert Committee; HRs, hazard ratios; CI, confidence interval; CVD, cardiovascular disease. Values in bold show statistical significance. Model 1 adjusted for age (year, continuous), sex, and worksite; model 2 additionally adjusted for BMI (kg/m<sup>2</sup>, continuous), smoking status (never smoker, former smoker, or current smoker), alcohol intake (<23 g ethanol/day), occupational physical activity (sedentary, mostly standing and walking often, or fairly active), job position (high or low), hypertension (yes or no), and dyslipidemia (yes or no).

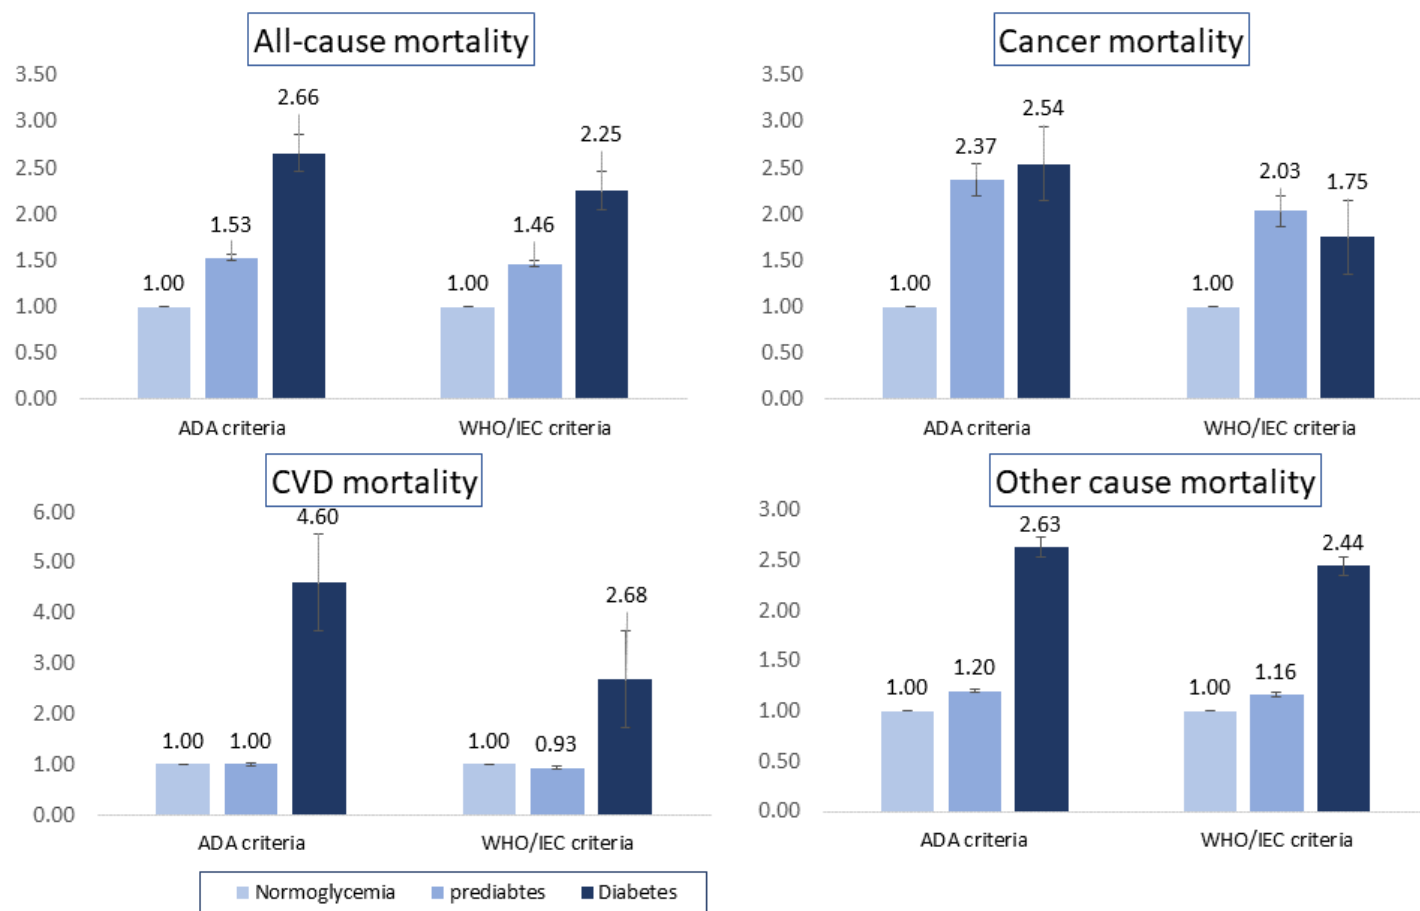

ADA, American Diabetes Association; WHO, World Health Organization; IEC, International Expert Committee; HRs, hazard ratios; CI, confidence interval; CVD, cardiovascular disease. Model was adjusted for age (year, continuous), sex, worksite, BMI (kg/m<sup>2</sup>, continuous), smoking status (never smoker, former smoker, or current smoker), hypertension (yes or no), and dyslipidemia (yes or no).

**Supplementary Figure 1**– Multivariable-adjusted HRs (95% CI) of all-cause and cause-specific mortality according to the baseline status of prediabetes and diabetes

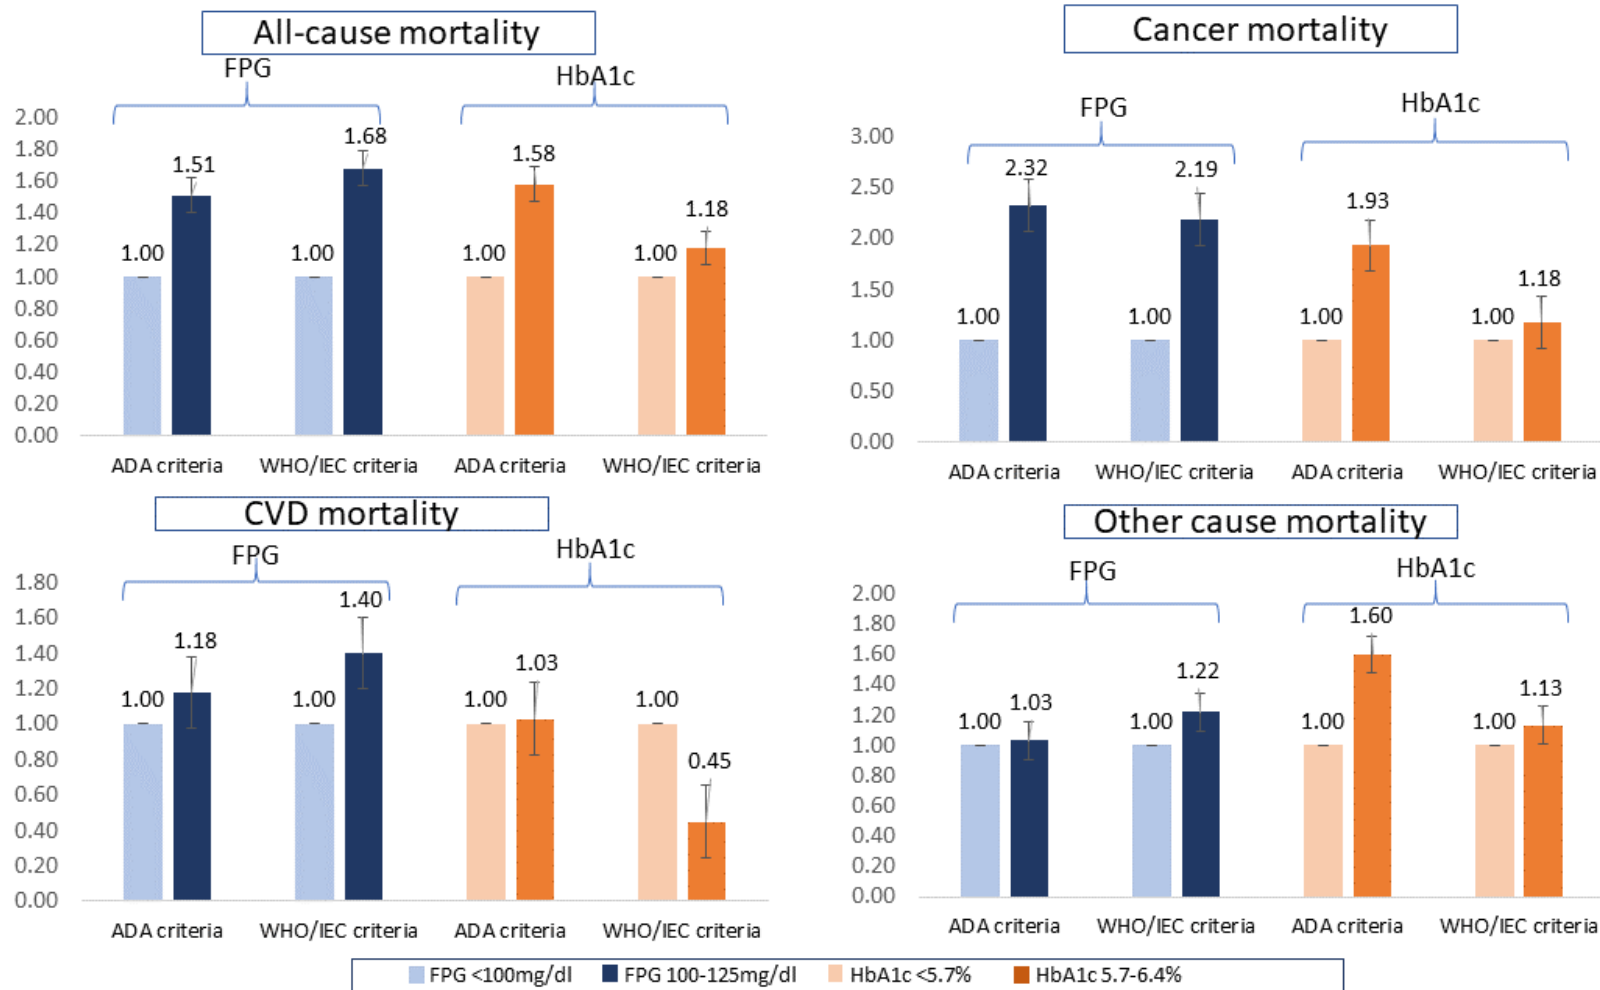

ADA, American Diabetes Association; WHO, World Health Organization; IEC, International Expert Committee; HRs, hazard ratios; CI, confidence interval; CVD, cardiovascular disease. Model was adjusted for age (year, continuous), sex, worksite, BMI (kg/m<sup>2</sup>, continuous), smoking status (never smoker, former smoker, or current smoker), hypertension (yes or no), and dyslipidemia (yes or no).

**Supplementary Figure 2**– Multivariable-adjusted HRs (95% CI) of all-cause and cause-specific mortality for prediabetes subgroups, using the ADA or the WHO/IEC criteria
